# Supplementary material
Source: PubMed Central journal article supplement (PMC3872122)
Supplement: NIHMS535808-supplement.pdf [file NIHMS535808-supplement.pdf]

## Q1\*-T144C/E1-WT

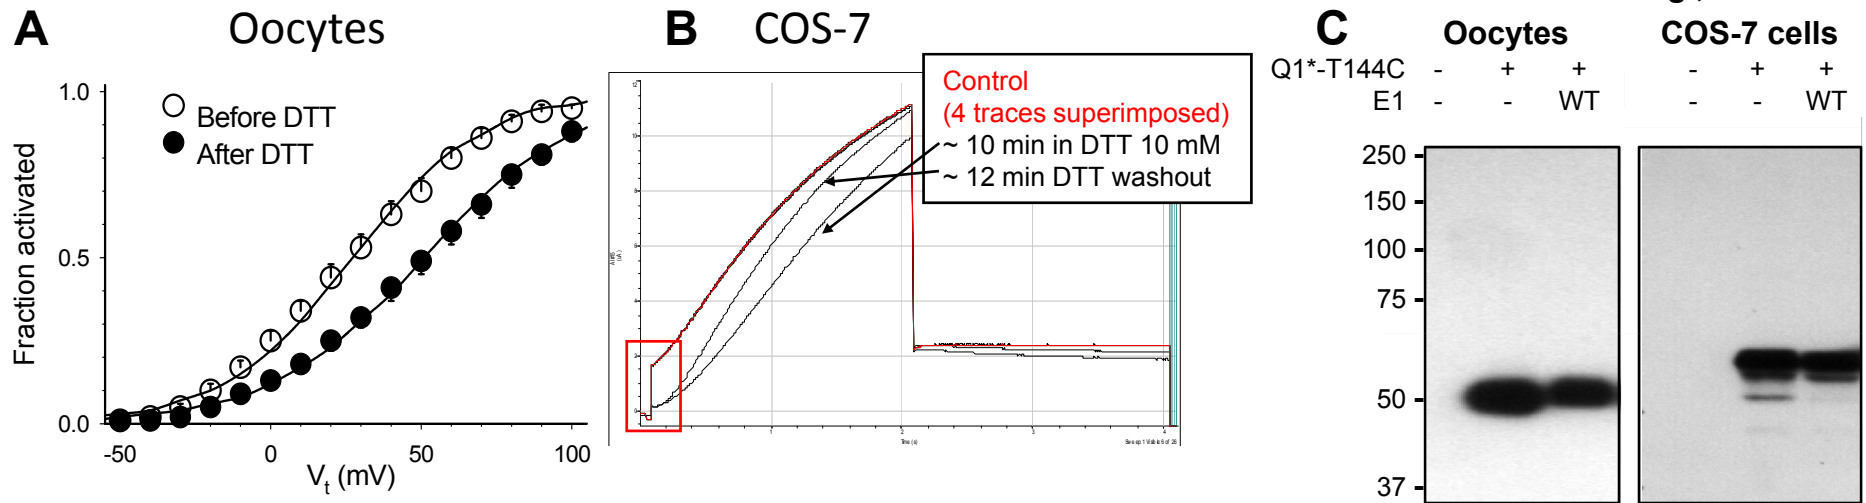

**Fig. S1 (A)** DTT treatment of Q1\*-T144C/E1-WT expressed in oocytes shifts the activation curve in the positive direction. **(B)** DTT treatment of Q1\*-T144C/E1-WT expressed in a COS-7 cell abolishes the constitutive current component, reflecting a positive shift in the voltage-dependence of activation similar to the oocyte data. **(C)** Oocytes and COS-7 cells expressing the cRNA(s) or cDNA(s) listed above ('-' no cRNA or no cDNA negative controls) are subjected to whole cell lysis followed by SDS-PAGE under non-reducing conditions. After blotting the proteins to membrane, the membrane is probed with C-20 pAb (oocytes) or V5 mAb (COS-7 cells) for Q1 detection. Only the Q1 monomer bands (~ 50 kDa in oocytes and 60 kDa in COS-7 cells) are detected for Q1\*-T144C expressed alone or paired with E1-WT. There is no higher molecular weight Q1-positive band up to 250 kDa.

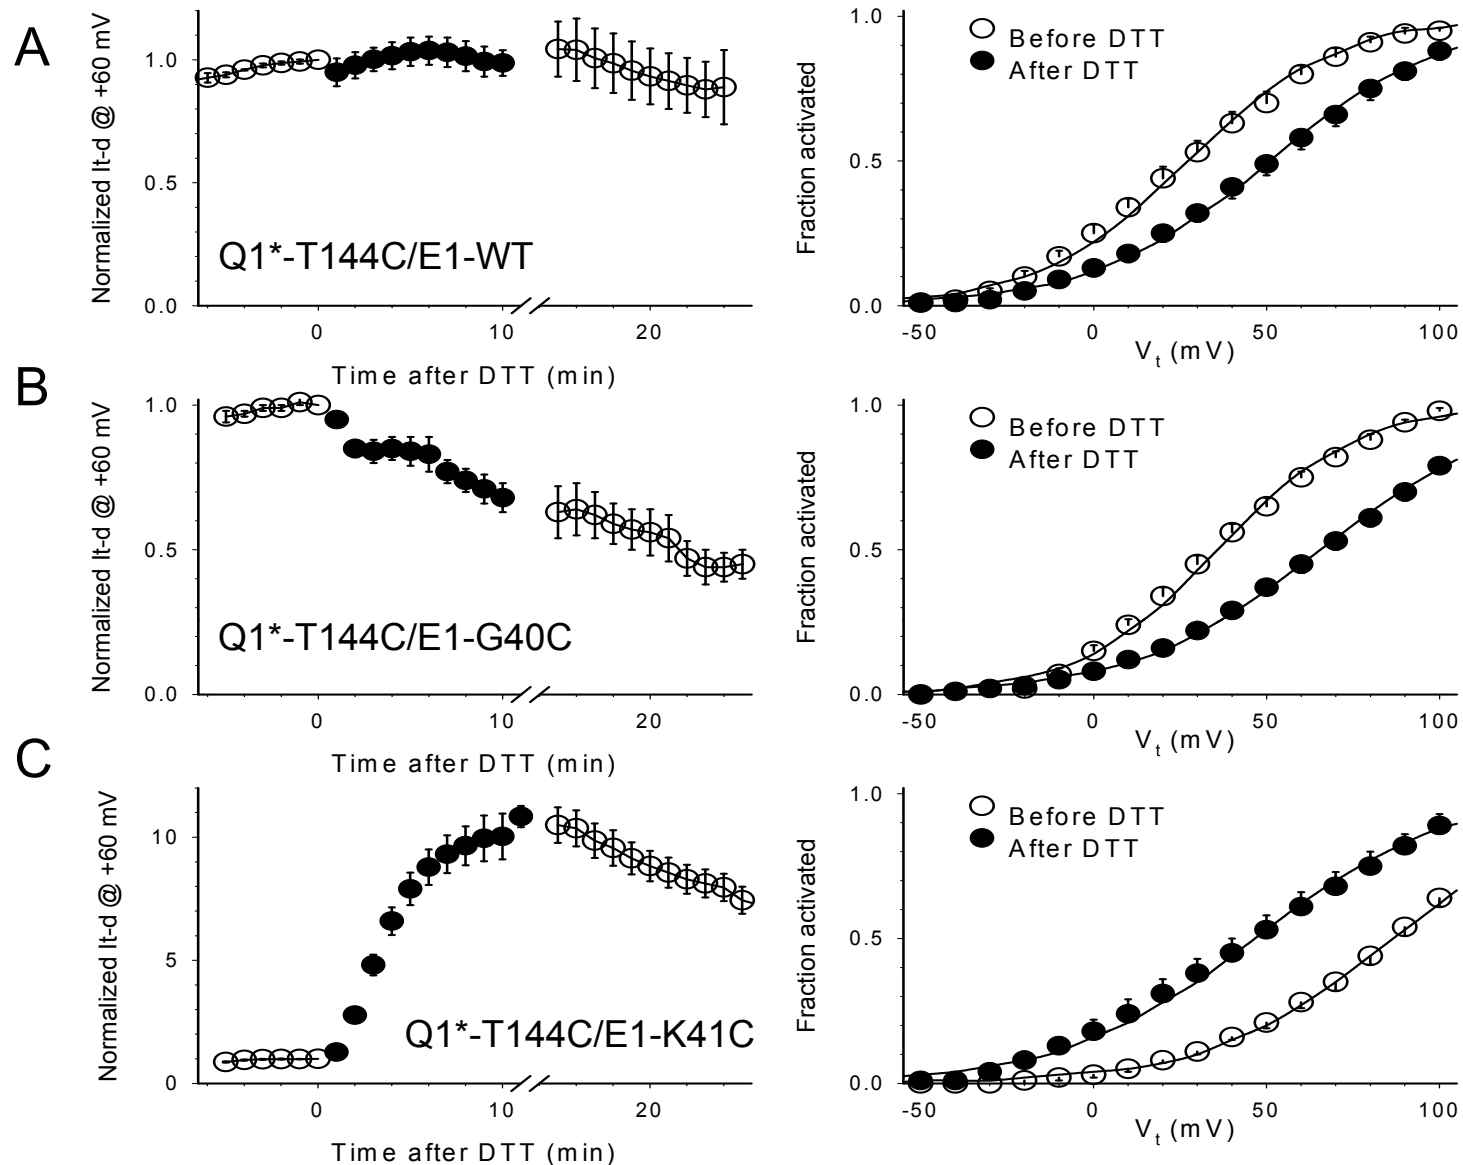

**Fig. S2** *Left column:* time courses of changes in current amplitudes monitored by 2-s test pulses to +60 mV before, during, and after DTT (10 mM) exposure for the Q1\*-T144C/E1 pairs specified in the insets. Closed circles: data points measured in DTT. *Right column:* activation curves before and after DTT treatment from the same sets of experiments. Data are pooled from 5 – 6 oocytes in each group and shown as mean  $\pm$  SE. **(A)** vs **(B)** Short exposure to DTT reveals that, relative to Q1\*-T144C/E1-WT, Q1\*-T144C/E1-G40C manifests more rapid decline in the current amplitude and more pronounced positive shift in the activation curve. **(C)** Short exposure of Q1\*-T144C/E1-K41C to DTT, when the current amplitude reaches the peak of enhancement, reveals a prominent negative shift in the activation curve.

## Oocyte expression, non-reducing Q1 immunoblots

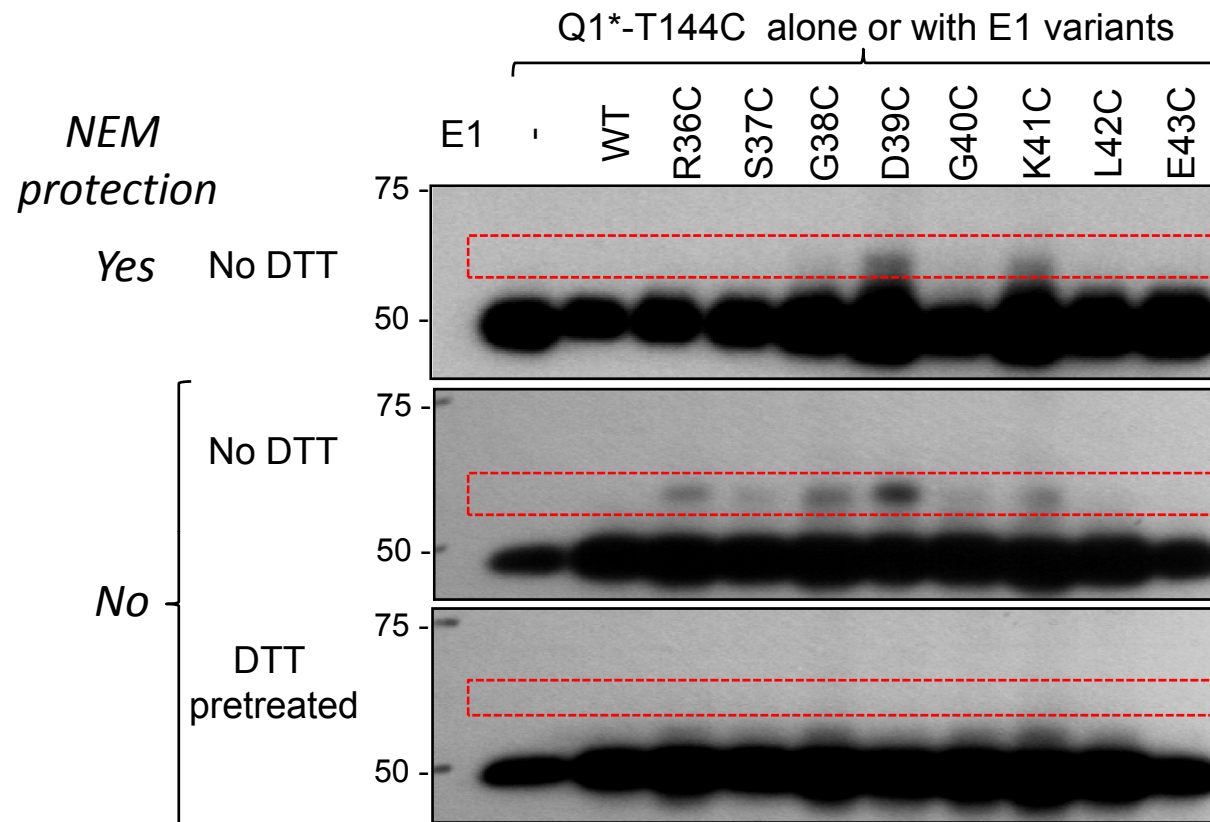

**Fig. S3** Oocytes are injected with cRNA(s) listed above. Three days after cRNA injection, oocytes are subjected to whole cell lysis with (top) or without (middle & bottom) pretreatment with N-ethyl maleimide (NEM). In the latter group, each of the whole cell lysates is divided into 2 equal aliquots, one treated with DTT while the other serving as control. The whole cell lysates are run on non-reducing SDS-PAGE, and the membranes are probed for Q1 by C-20 pAb. The red dashed rectangles highlight Q1\*/E1 disulfide bonded bands (middle), that are largely missing in NEM-pretreated oocyte WCL (top) and abolished by DTT (bottom).

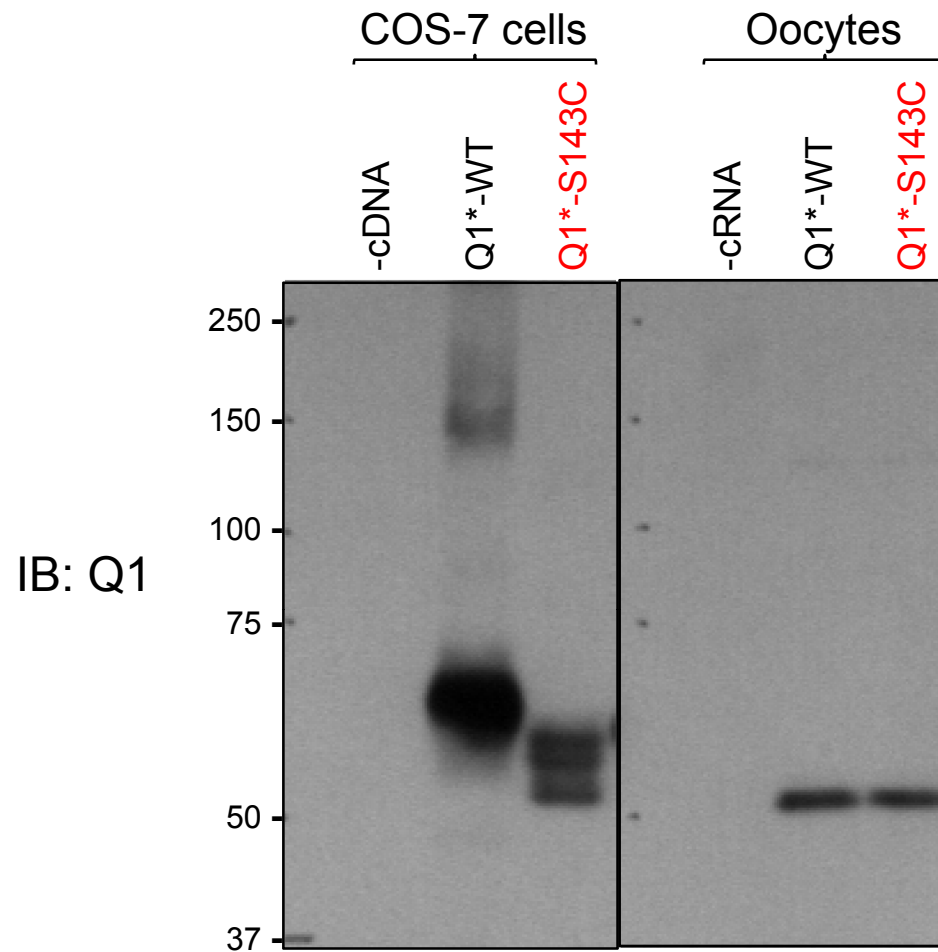

**Fig. S4** In immunoblots of COS-7 cells Q1\*-S143C migrates as doublet bands of < 60 kDa, significantly smaller than the size of Q1\*-WT (left), while in immunoblots of oocytes both Q1\*-S143C & Q1\*-WT migrate as ~ 50 kDa bands. Since COS-7 cells can effectively N-glycosylate membrane proteins while oocytes cannot, the smaller Q1\*-WT band size in oocytes likely reflects the low level of N-glycosylation. Since Q1\*-WT is effectively expressed in oocytes, the lack of full N-glycosylation does not prevent the channel from reaching the cell surface. This is consistent with the observation that Q1\*-S143C expressed in oocytes is functional (Fig. 12A in the main text). On the other hand, the small Q1\*-S143C size in COS-7 immunoblots suggests that either the channels are not properly N-glycosylated (immature form, trapped inside cells) or are degraded. This is consistent with the lack of channel function in patch clamp experiments.
